1 **Endophytic microbiome variation at the level of a single plant seed**

2

3 **Authors**

4 AF Bintarti<sup>1</sup>, A Sulesky-Grieb<sup>2,3</sup>, N Stopnisek<sup>1,4</sup>, A Shade<sup>1,2,3,4\*</sup>

5

6 **Affiliations**

7 1. Department of Plant, Soil and Microbial Sciences, Michigan State University, East

8 Lansing, MI 48824

9 2. Department of Microbiology and Molecular Genetics, Michigan State University, East

10 Lansing, MI 48824

11 3. Program in Ecology, Evolution and Behavior, Michigan State University, East Lansing, MI

12 48824

13 4. The Plant Resilience Institute, Michigan State University, East Lansing, MI 48824

14

15 \*Corresponding author, shadeash@msu.edu

16

17 **Abstract**

18 Like other plant compartments, the seed harbors a microbiome. The members of the

19 seed microbiome are the first to colonize a germinating seedling, and they initiate the

20 trajectory of microbiome assembly for the next plant generation. Therefore, the members of

21 the seed microbiome are important for the dynamics of plant microbiome assembly and the

22 vertical transmission of potentially beneficial symbionts. However, it remains challenging to

23 assess the microbiome at the individual seed level (and, therefore, for the future individual  
24 plant) due to low endophytic microbial biomass, seed exudates that can select for particular  
25 members, and high plant and plastid contamination of resulting reads. Here, we report a  
26 protocol for extracting metagenomic DNA from an individual seed (common bean, *Phaseolus*  
27 *vulgaris* L.) with minimal disruption of host tissue, which we expect to be generalizable to other  
28 medium- and large- seed plant species. We applied this protocol to quantify the 16S rRNA V4  
29 and ITS2 amplicon composition and variability for individual seeds harvested from replicate  
30 common bean plants grown under standard, controlled conditions to maintain health. Using  
31 metagenomic DNA extractions from individual seeds, we compared seed-to-seed, pod-to-pod,  
32 and plant-to-plant microbiomes, and found highest microbiome variability at the plant level.  
33 This suggests that several seeds from the same plant could be pooled for microbiome  
34 assessment, given experimental designs that apply treatments at the maternal plant level. This  
35 study adds protocols and insights to the growing toolkit of approaches to understand the plant-  
36 microbiome engagements that support the health of agricultural and environmental  
37 ecosystems.

38

### 39 **Keywords**

40 16S rRNA, ITS, *Phaseolus vulgaris* L., legume, pod, fruit, DNA extraction, microbiome assembly

41

42

43

## 44 **Introduction**

45           Seed microbiomes offer a reservoir of microbiota that can be vertically passed from  
46 maternal plants to offspring (Mitter et al. 2017; Shade et al. 2017; Truyens et al. 2015) and  
47 some of these members have plant-beneficial phenotypes (Adam et al. 2018; Berg and  
48 Raaijmakers 2018; Bergna et al. 2018; López-López et al. 2010). Therefore, the seed  
49 microbiome is expected to play a key role in plant health and fitness (Barret et al. 2015), and  
50 especially in the assembly and establishment of the developing plant's microbiome (Chesneau  
51 et al. 2020). This expected importance of the seed microbiome has fueled recent research  
52 activity to use high-throughput sequencing to characterize the seed microbiomes of various  
53 plants (e.g., Chartrel et al. 2021; Dai et al. 2020; Eyre et al. 2019; Raj et al. 2019; Rodríguez et al.  
54 2020; Xing et al. 2018).

55           Seed microbiomes include microbial members that live on the seed surface as epiphytes  
56 and members that colonize inside the internal tissue of the seed as endophytes (Nelson 2018).  
57 Among these microbiome members, endophytes that closely associate with endosperm and  
58 embryo are more likely to be transmitted to the next plant generations than are seed-  
59 associated epiphytes (Barret et al. 2016; Nelson 2018). By itself, an endophytic association does  
60 not confirm that there is a functional benefit or co-evolutionary relationship between the plant  
61 and the microbiome member (Nelson 2018). However, endophytic microbes offer the first  
62 source of inoculum for the germinating seedling (as reviewed in Nelson 2018; Vujanovic and  
63 Germida 2017), and, given the potential for priority effects or pathogen exclusion, these  
64 members can have implications for the mature plant's microbial community structure.  
65 Therefore, understanding the endophytic seed microbiome is expected to provide insights into

66 mechanisms of seed facilitation of microbiome assembly and the vertical transmission of  
67 microbiome members over plant generations.

68 As is true for other plant compartments, different plant species or divergent crop  
69 lines/varieties/cultivars often have different seed microbiome composition or structure  
70 (Wassermann et al. 2019; Klaedtke et al. 2016; Johnston-Monje and Raizada 2011; López-López  
71 et al. 2010). However, many seed microbiome studies have reported generally high variability  
72 across seed samples from the same plant type and treatment (Bergna et al. 2018; López-López  
73 et al. 2010; Bintarti et al. 2020), with strong explanatory value of either seed origin/seed lot,  
74 geographic region or soil edaphic conditions (Chartrel et al. 2021; Klaedtke et al. 2016;  
75 Johnston-Monje and Raizada 2011; but see also Adam et al. 2018 for an exception). While these  
76 insights may call into question the proportion of “inherited” versus acquired seed microbiome  
77 members, the high microbiome variability may be in part due to methods applied to extract the  
78 microbial DNA from the seed compartment, and different methods applied across studies. For  
79 instance, some studies surface sterilize the seeds while others do not; some germinate the seed  
80 prior to microbiome analysis while others do not, etc. One source of microbiome variability  
81 could be the common practice of the pooling of many seeds from the same or different plants  
82 to produce a composite seed microbiome sample for DNA extraction. Because multiple seeds  
83 are investigated at once, it is unclear at what level the most microbiome variability is highest—  
84 the seed, the pod or fruit, the plant, or the field or treatment. This information is required to  
85 determine the necessary sample size in well-powered experimental designs. More importantly,  
86 the question of vertical transmission cannot directly be addressed without seed microbiome  
87 assessment of an individual.

88           Our study objectives were: 1) to determine the appropriate observational unit of  
89   endophytic seed microbiome assessment for common bean (*Phaseolus vulgaris* L) by  
90   quantifying seed-to-seed, pod-to-pod, and plant-to-plant variability in 16S rRNA V4 and ITS2  
91   amplicon analyses; and 2) to develop a robust protocol for individual seed microbiome  
92   extraction that could be generally applied to other plants that have similarly medium- to large-  
93   sized seeds. We found that that plant-to-plant variability under controlled growth conditions  
94   exceeded within-plant variability and conclude that seeds can be pooled by maternal plant (but,  
95   not across different plants) in study designs that aim to compare seed microbiomes resulting  
96   from treatments applied at the plant level.

97

## 98   **Materials and Methods**

### 99   ***Plant growth conditions***

100           Because we targeted the endophytic seed microbiome, surface sterilization of the bean  
101   seeds was conducted before germination and planting. To sterilize, seeds were soaked in a  
102   solution of 10% bleach with 0.1% Tween20 for 15 minutes, then rinsed four times with sterile  
103   water. The final rinse water was plated on tryptic soy agar (TSA) and potato dextrose agar (PDA)  
104   plates to test for sterilization efficacy. Sterilized seeds were placed in Petri dishes on sterile  
105   tissue paper moistened with sterile water, and allowed to germinate in in the dark for four  
106   days. After four days, the radicle had emerged and the germinated seeds were ready to be  
107   transferred to the growth chamber. The germinated seeds were planted in three 4.54 L (1-  
108   gallon) pots filled with a 50:50 v/v mixture of agricultural bean field soil and vermiculite. The  
109   pots were placed in a BioChambers model SPC-37 growth chamber with a 14-h day/10-h night

110 cycle at 26°C and 22°C, respectively, 260 mE light intensity, and 50% relative humidity. All  
111 plants received 300 mL of water every other day and 200 mL of half-strength Hoagland solution  
112 (Hoagland and Arnon 1950) once a week.

113

#### 114 ***Study design***

115 We planted three germinated seeds per pot and culled to one seedling per pot at the  
116 early vegetative growth stage. There were three plant replicates designated as A, B, and C,  
117 grown under the above-described conditions for normal, healthy growth. The three plants  
118 produced different numbers of pods and total seeds (plant A = 5 pods, 22 seeds; plant B = 6  
119 pods, 29 seeds; and plant C = 7 pods, 26 seeds) with the number of seeds varying across pods (2  
120 to 6 seeds per pod). We aimed to balance and maximize number of seeds across plants.  
121 Therefore, we extracted metagenomic DNA from 3 pods from plants A and C, and 6 pods from  
122 plant B, with 3 to 4 seeds in each pod. For the 16S V4 analysis we had 3 pods from plant A (A1,  
123 A2 and A3= 4 seeds), 6 pods from plant B (B1 through B6 = 4 seeds), and 3 pods from plant C  
124 (C5= 3 seeds, C6 and C7= 4 seeds) for a total of 47 individual seed samples analyzed. For the  
125 ITS2 analysis, we were unable to amplify fungal target DNA from pod A1 or pod B1, for a total of  
126 45 individual seed samples analyzed.

127

#### 128 ***Seed harvest and endophyte metagenomic DNA extraction***

129 Once the plants reached maturity at the R9 growth stage (yellowing leaves and dry  
130 pods), the seeds were harvested for endophytic microbiome analysis. Seeds were distinguished  
131 by plant and pod. The endophytic microbiome of each seed was extracted and sequenced

132 individually. To extract the endophytic metagenomic DNA (mgDNA), a protocol was adapted  
133 from Barret et al. 2015 and Rezki et al. 2018. First, the seeds were surface-sterilized as above  
134 and the seed coat was carefully removed using sterilized forceps. Each seed was then soaked in  
135 3 mL of PBS solution with 0.05% Tween20 (hereafter, “soaking solution”) overnight at 4°C with  
136 constant agitation of 170 rpm. Since low levels of microbial biomass are expected in single seed  
137 extractions, positive and negative controls were included in the extraction protocol. This  
138 ensures that if no extractable microbial DNA is present in a sample that it is representative of  
139 the sample, rather than the extraction methods. A mock community was used as a DNA  
140 extraction positive control by adding one, 75 µL aliquot of the ZymoBIOMICS™ Microbial  
141 Community Standard (Zymo Research, Irvine, CA, United States) to 3 mL of the soaking solution  
142 immediately prior to conducting the extraction protocol. Sterile soaking solution (3 mL) was  
143 used as a negative DNA extraction control.

144       After soaking overnight, the samples were centrifuged at 4500xg for 60 minutes at 4°C  
145 to pellet any material that had been released from the seed tissues. After centrifugation the  
146 seed was removed, and the pelleted material was resuspended in 1-2 mL of supernatant and  
147 transferred to a microcentrifuge tube for DNA extraction using the E.Z.N.A® Bacterial DNA Kit  
148 (Omega Bio-tek, Inc. Norcross, GA, United States). The manufacturer’s Centrifugation Protocol  
149 was used with minor modifications. Specifically, the pelleted seed material was suspended in TE  
150 buffer (step 4), the incubation for the lysozyme step was extended to 20 minutes, 30 µL of  
151 elution buffer was used, and the elution step was extended to a 15 minute incubation. These  
152 modifications were performed to maximally recover the limited amount of mgDNA expected

153 from a single seed. We detail the standard operating protocol, and provide notes on the  
154 alternatives that we tested in optimizing this protocol in the Supplementary Material.

155

### 156 ***PCR amplification and amplicon sequencing***

157 To confirm successful DNA extraction from the seed pellet, DNA quantification and  
158 target gene polymerase chain reaction (PCR) assays were performed. First, the DNA extracted  
159 from the seed samples and the positive and negative controls were quantified using the  
160 Qubit™ dsDNA BR Assay Kit (ThermoFisher Scientific, Waltham, MA, United States). Then, PCR  
161 amplification and sequencing of the V4 region of 16S rRNA bacterial/archaeal gene and the ITS2  
162 region of the ITS fungal gene were performed. The V4 region of 16S rRNA gene amplification  
163 was conducted using 515f (5'-GTGCCAGCMGCCGCGTAA-3') and 806r (5'-  
164 GGACTACHVGGGTWTCTAAT-3') universal primers (Caporaso et al. 2011) under the following  
165 conditions: 94°C for 3 min, followed by 35 cycles of 94°C (45 s), 50°C (60 s), and 72°C (90 s), with  
166 a final extension at 72°C (10 min). The amplification was performed in 25 µl mixtures containing  
167 12.5 µl GoTaq® Green Master Mix (Promega, Madison, WI, United States), 0.625 µl of each  
168 primer (20 µM), 2 µl of DNA template (~1 ng per µl), and 9.25 µl nuclease free water. The  
169 mgDNA (concentration of ~ 1 ng per µl) was sequenced at the Research Technology Support  
170 Facility (RTSF) Genomics Core, Michigan State sequencing facility using the Illumina MiSeq  
171 platform v2 Standard flow cell. The sequencing was performed in a 2x250bp paired end format.

172 The PCR amplification of the ITS2 region of the ITS gene was performed using ITS86f (5'-  
173 GTGAATCATCGAATCTTTGAA-3') and ITS4 (5'- TCCTCCGCTTATTGATATGC-3') primers (Op De  
174 Beeck et al. 2014) with addition of index adapters by the RTSF Genomics Core. The PCR



175 amplification of the ITS2 was conducted under the following conditions: 95°C for 2 min,  
176 followed by 40 cycles of 95°C (30 s), 55°C for (30 s), and 72°C for (1 min), with a final extension  
177 at 72°C for 10 min. The amplification was performed in 50 µl mixture containing 20 µl  
178 GoTaq®Green Master Mix (Promega, Madison, WI, United States), 1 µl of each primer (10 µM),  
179 1 µl of DNA template (~ 1 ng per µl), and 27 µl nuclease free water. The PCR products were  
180 purified using QIAquick® PCR Purification Kit (QIAGEN, Hilden, Germany). Purified PCR products  
181 with a concentration range 6-10 ng per µl were sequenced at the RTSF Genomics Core using  
182 Illumina MiSeq platform v2 Standard flow cell and 2x250bp paired end format.

183

#### 184 ***Sequence analysis***

185 The USEARCH pipeline (v.10.0.240) was used to merge paired-end bacterial/archaeal  
186 raw reads, filter for low-quality sequences, dereplicate, remove singletons, denoise, and check  
187 for chimeras (Edgar and Flyvbjerg 2015). An in-house open reference strategy was performed  
188 for OTU clustering (Rideout et al. 2014). First, closed-reference OTU picking was performed by  
189 clustering the quality filtered reads against the SILVA database (v.132) (Quast et al. 2013) at  
190 97% identity using USEARCH algorithm (usearch\_global command) (Edgar 2010). Then, de novo  
191 OTU picking process was performed on the reads that failed to match the reference using  
192 UPARSE-OTU algorithm (cluster\_otus command) (Edgar 2013) at 97% identity. Finally, closed-  
193 reference and de novo OTUs were combined into a full set of representative sequences. The  
194 merged sequences were then mapped back to the representative sequences using the  
195 usearch\_global command.

196           Sequence alignment, taxonomy assignment, non-bacteria/archaea filtering, and  
197 phylogenetic diversity calculation were performed using QIIME 1.9.1. The representative  
198 sequences were aligned against the SILVA database (v.132) (Caporaso, Kuczynski, et al. 2010)  
199 using PyNAST (Caporaso, Bittinger, et al. 2010). The unaligned OTUs and sequences were  
200 excluded from the OTU table and the representative sequences file, respectively. Taxonomy  
201 assignment was performed using the default classifier method (UCLUST algorithm) at a  
202 minimum confidence of 0.9 (Edgar 2010) using SILVA database (v.132) as the reference. Plant  
203 contaminants (chloroplast and mitochondria) and unassigned taxa were removed from the OTU  
204 table and the representative sequences using `filter_taxa_from_otu_table.py` and `filter_fasta.py`  
205 command. Filtering the microbial contaminants from the OTU table was conducted in R  
206 (v.3.4.2) (R Core Development Team) using the `microDecon` package (McKnight et al. 2019).  
207 Reads were normalized using Cumulative Sum Scaling (CSS) method in `metagenomeSeq`  
208 Bioconductor package on R (Paulson et al. 2013).

209           The fungal ITS raw reads were processed using the USEARCH (v.10.0.240) pipeline. Read  
210 processing included merging paired-end reads, removing primers using `cutadapt` (v.2.1) (Martin  
211 2011), dereplication, and singleton removal. OTUs were picked and chimeras removed using `de`  
212 `novo` clustering at 97% identity threshold with the UPARSE-OTU algorithm (`cluster_otus`  
213 command, Edgar 2013). Then, all merged sequences were mapped to the clustered reads using  
214 `usearch_global` command to generate an OTU table. Fungal taxonomic classification was  
215 performed in CONSTAX (Gdanetz et al. 2017) using RDP Classifier (v.11.5) (Cole et al. 2014;  
216 Wang et al. 2007) at a minimum confidence of 0.8 and with the UNITE reference database  
217 (release 01-12-2017). Plant and microbial contaminants removal and read normalization were

218 performed in R (v.3.4.2). Plant contaminants were removed from the OTU table by filtering out  
219 OTUs that were assigned into Kingdom Plantae. Microbial contaminants were removed using  
220 the microDecon package (McKnight et al. 2019). The CSS method from the metagenomeSeq  
221 Bioconductor package was performed to normalize the fungal reads (Paulson et al. 2013).

222

### 223 ***Microbial community analysis***

224 Microbiome statistical analyses were conducted in R (v.3.4.2) (R Core Development  
225 Team). Microbial alpha and beta diversity were calculated on the CSS- normalized OTU table  
226 using the vegan package (v.2.5-7) (Oksanen et al. 2019). Richness and Faith's phylogenetic  
227 diversity were used to analyze the bacterial/archaeal alpha diversity. For fungal alpha diversity,  
228 we used richness. The evenness of the seed microbiomes was visualized using rank-abundance  
229 curves (Phyloseq package (v.1.28.0) in R (McMurdie and Holmes 2013)). Differences in alpha  
230 diversity among plants and pods were determined by fitting the Linear Mixed-Effects Model  
231 (LMM) using the lme() function of the nlme package (version 3.1-152) (Pinheiro et al. 2021). We  
232 performed LMM because the study has an unbalanced nested design with pod as the random  
233 factor, nested within plant as the fixed factor. Microbial composition and relative abundance  
234 were analyzed using the Phyloseq package (v.1.28.0) in R (McMurdie and Holmes 2013).

235 Beta diversity was calculated using Jaccard distances and visualized using principal  
236 coordinate analysis (PCoA) plot. We used the Jaccard index, which is based on presence-  
237 absence, rather than a metric based on relativized abundance because we reasoned that the  
238 seed microbiome members are likely to be dormant inside the seed prior to germination (Cope-  
239 Selby et al. 2017), and that any differences in relative abundances are not directly attributable

240 to competitive fitness outcomes inside the seed. Furthermore, exponential growth would allow  
241 that any viable cell successfully packaged and passaged via the seed could, in theory,  
242 successfully colonize the new plant. Nested permutational multivariate analysis of variance  
243 (PERMANOVA) using the function `nested.npmanova()` from the BiodiversityR package (Kindt  
244 2020) was performed to assess the microbial community structure among plants and pods. We  
245 performed multivariate analysis to check the homogeneity of dispersion (variance) among  
246 groups using the function `betadisper()` (Oksanen et al. 2019). We performed PERMADISP to test  
247 the significant differences in dispersions between groups and Tukey's HSD test to determine  
248 which groups differ in relation to the dispersions (variances).

249 Power analysis and sample size were calculated using the `pwr.t.test()` function from the  
250 `pwr` package (v.1.3-0). We performed power analysis of two-category t-test. Because the most  
251 microbiome variability was observed across plants, we pooled individual seed sequence profiles  
252 in silico at the plant level for this analysis. We calculated Cohen's d effect size given the  
253 information of mean and standard deviation of bacterial/archaeal alpha diversity (richness and  
254 phylogenetic diversity) from three plant samples from this study: Plant A (n = 12; richness: M =  
255 30.58, SD = 6.42, phylogenetic diversity: M = 4.17, SD = 0.89), Plant B (n = 24; richness: M =  
256 18.21, SD = 7.35, phylogenetic diversity: M = 2.92, SD = 0.82) and Plant C (n = 11; richness: M =  
257 19.09, SD = 10.95, phylogenetic diversity: M = 3.09, SD = 1.39). We calculated the common  
258 standard deviation ( $\sigma_{\text{pool}}$  of all groups) using the above information, then we calculated  
259 Cohen's d effect size for both richness and phylogenetic diversity. Cohen's d effect size was  
260 defined by calculating the difference between the largest and smallest means divided by the  
261 square root of the mean square error (or the common standard deviation). Power analysis was

262 run with Hedges's g effect size (corrected with Cohen's d effect size) and significant level of  
263 0.05.

264

#### 265 ***Data and code availability***

266 The computational workflows for sequence processing and ecological statistics are  
267 available on GitHub ([https://github.com/ShadeLab/Bean\\_seed\\_variability\\_Bintarti\\_2021](https://github.com/ShadeLab/Bean_seed_variability_Bintarti_2021)). Raw  
268 sequence data of bacteria/archaea and fungi have been deposited in the Sequence Read  
269 Archive (SRA) NCBI database under Bioproject accession number PRJNA714251.

270

#### 271 **Results**

##### 272 ***Sequencing summary and microbiome coverage***

273 A total of 5,056,769 16S rRNA V4 and 8,756,009 ITS2 quality reads were generated from  
274 47 mgDNA samples purified from individual seeds for bacteria/archaea, and from 45 samples  
275 for fungi. We removed more than 90 % of reads that were plant contaminants (**Fig. S1**),  
276 resulting in 17,128 and 67,878 16S rRNA bacterial/archaeal and ITS fungal reads, respectively.  
277 After removing plant and microbial contaminants, we determined 211 bacterial/archaeal and  
278 57 fungal operational taxonomic units (OTUs) defined at 97% sequence identity. While the  
279 majority of individual seeds from plants A and B had exhaustive to sufficient sequencing effort,  
280 some seeds from plant C did not (**Fig. 1a**). However, the fungal rarefaction curves reached  
281 asymptote and had sufficient effort (**Fig. 1b**). Both bacterial/archaeal and fungal seed  
282 microbiomes were highly uneven with few dominant and many rare taxa, as typical for  
283 microbiomes (**Fig 1c,d**).

284

## 285 ***Microbiome Diversity***

286           There were differences in bacterial/archaeal richness among seeds from different plants  
287 (LMM;  $df = 2$ ,  $F$ -value = 6.91,  $p$ -value = 0.015) (**Fig. 2a**), where plant B and C had lower seed  
288 richness than plant A (Tukey's HSD post hoc test;  $p$ -value = 0.001 and 0.006, respectively).  
289 However, bacterial/archaeal richness among seeds from pods collected from the same plant  
290 were not different (LMM,  $p$ -value > 0.05) (**Fig. 2b**). Similarly, bacterial/archaeal phylogenetic  
291 diversity were different among seeds collected from different plants (LMMs;  $df = 2$ ,  $F$ -value =  
292 6.56,  $p$ -value = 0.003) (**Fig. 2c**), but not among seeds from pods within the same plant (LMM,  $p$ -  
293 value > 0.05) (**Fig. 2d**). Plants B and C had lower seed microbiome bacterial/archaeal  
294 phylogenetic diversity compared to plant A (Tukey's HSD post hoc test,  $p$ -value = 0.001 and  
295 0.013, respectively). We observed no differences in fungal richness among seeds from different  
296 plants (LMM;  $df = 2$ ,  $F$ -value = 1.11,  $p$ -value = 0.37) (**Fig. 2e**), and among seeds from pods within  
297 the same plant (LMM,  $p$ -value > 0.05) (**Fig. 2f**). To summarize, these results suggest that seed  
298 bacterial/archaeal alpha diversity, but not fungal, varied plant to plant.

299           We detected a difference in seed bacterial/archaeal structure among plants (nested  
300 PERMANOVA,  $df = 2$ ,  $F$ -ratio = 2.94,  $p$ -value = 0.001) (**Fig. 3a**), but, again, not among pods from  
301 the same plant (nested PERMANOVA,  $df = 9$ ,  $F$ -ratio = 0.99,  $p$ -value = 0.63). Though separation  
302 among pods and plants are not obvious on the PCoA for the fungal seed microbiomes, we  
303 detected modest differences in fungal community structure among seeds from different plants  
304 (nested PERMANOVA,  $df = 2$ ,  $F$ -ratio = 1.55,  $p$ -value = 0.02) (**Fig. 3b**), as well as among seeds  
305 from pods from the same plant (nested PERMANOVA,  $df = 9$ ,  $F$ -ratio = 1.27,  $p$ -value = 0.03). An

306 analysis of beta-dispersion revealed that there were differences in seed microbiome dispersion  
307 across different plants for bacterial/archaeal communities (PERMADISP,  $df = 2$ , F-value = 63.9,  
308 p-value = 0.001) (**Fig. 3c**), but not for fungal communities (PERMADISP,  $df = 2$ , F-value = 0.22, p-  
309 value = 0.798) (**Fig. 3d**). Therefore, statistical differences in the seed microbiome across plants  
310 for the bacteria/archaea may be attributed to either centroid or dispersion, while fungal seed  
311 communities were different by centroid.

312

### 313 ***Bean seed microbiome composition***

314 We identified 135 bacterial/archaeal and 49 fungal taxa at the genus level. The  
315 bacterial/archaeal individual seed communities were dominated by taxa from class  
316 Gammaproteobacteria (50.47%), Bacilli (24.48%), Alphaproteobacteria (8.68 %), and  
317 Bacteroidia (6.59 %) (**Fig. 4a**), and include *Pseudomonas* (13.58 %), *Bacillus* (10.2 %),  
318 *Acinetobacter* (9.5 %), *Raoultella* (7.09%), and *Escherichia-Shigella* (5.19%) as the major genera.  
319 Among members of the class Alphaproteobacteria, we also found genera *Bradyrhizobium* and  
320 *Allorhizobium-Neorhizobium-Pararhizobium-Rhizobium* with relative abundance of 2.57 and  
321 0.85 %, respectively. Although seed fungal community composition varied among plants and  
322 also pods within plant, the fungal community was dominated by taxa belonging to classes  
323 Pezizomycetes (53.44 %), Agaricomycetes (25.7 %), and Dothideomycetes (11.17 %) (**Fig. 4b**),  
324 and the genera *Helvella* (53.44 %), *Gautieria* (19.65%), *Acidomyces* (7.29 %),  
325 *Capnodiales\_unidentified\_sp\_23791* (2.52 %), and *Phlebiopsis* (1.82%).

326 A key objective of this research was to understand the sources of variability in the  
327 individual bean seed microbiome to inform future study design. Because we found that the

328 plant-to-plant seed microbiome variability was highest when grown in control conditions, we  
329 performed a power analysis to determine how many plants would be required to observe a  
330 treatment effect from seed samples pooled per plant. To detect the effect of treatment to  
331 bacterial/archaeal richness and phylogenetic diversity, pooled seeds from 9 and 12 plants are  
332 needed, respectively, for 16S rRNA richness and phylogenetic diversity, to achieve power of 0.8;  
333 and 13 and 19 plants to achieve power of 0.95 (**Fig. 5**).

334

### 335 **Discussion**

336       There remain gaps in our understanding of the persistence and assembly of seed  
337 microbiome members, especially across plant generations, and which microbiome members are  
338 beneficial and actively selected by, or even co-evolved with, the host. Here, we investigated the  
339 variability of the common bean microbiome at the resolution of the individual seed, which is  
340 the unit that delivers any vertically transmitted microbiome to the offspring. Because multiple  
341 legume seeds within a pod develop as a result of a single flower pollination, one simple  
342 hypothesis is that the individual seeds within a pod may harbor a highly similar microbiome if  
343 the floral pathway of assembly is prominent. However, recent work has suggested that the  
344 endophytic seed microbiome of green bean varieties of common bean likely colonize  
345 predominantly via the internal vascular pathway, and not the floral pathway (Chesneau et al.  
346 2020), which may result in more homogeneity among seed microbiomes of the same plant.  
347 Our data support this finding, as seeds from the same plant (and therefore a common vascular  
348 pathway across pods) had relatively low microbiome variability, especially as compared across  
349 plants. It is expected that the vascular pathway of seed microbiome assembly is more likely to



350 colonize the internal seed compartments (e.g., embryo), and therefore more likely to be  
351 vertically transmitted (Barret et al. 2016). It is yet unclear whether plant species that have a  
352 stronger relative importance of the floral pathway in seed microbiome assembly may exhibit  
353 higher microbiome variability at the pod/fruit level. Such an outcome may indicate that the  
354 experimental unit should instead be the pod level rather than the plant level for plant species  
355 dominated by floral assembly pathways.

356         There are many challenges in analyzing the microbiome of seeds generally and of a  
357 single seed in particular, which may be why cultivation-independent studies of single seeds are  
358 few (Abdelfattah et al. 2021). Previous studies showed that seeds have low microbial biomass  
359 and diversity (Adam et al. 2018; Chesneau et al. 2020; Rezki et al. 2016), especially relative to  
360 other plant compartments or soil. Therefore, many studies pool seeds to analyze the  
361 aggregated microbiome of many seeds and to get enough microbial biomass for metagenomic  
362 DNA extraction (Latz et al. 2021; Bergna et al. 2018; Wassermann et al. 2019; Adam et al. 2018;  
363 Johnston-Monje and Raizada 2011; Klaedtke et al. 2016). Generally, microbiome samples that  
364 have low biomass have numerous challenges in sequence-based analysis, as discussed  
365 elsewhere (Eisenhofer et al. 2019; Bender et al. 2018). First, unknown contaminants, either  
366 from nucleic acid kits or from mishandling of the samples, can have relatively high impact on  
367 the observed community composition, and so extraction and PCR controls are needed for  
368 assessment of contaminants and subtraction of suspected contaminants from the resulting  
369 community (Davis et al. 2018). Second, the sparse datasets (e.g., many zero observations for  
370 many taxa in many samples) generated from low biomass samples often require special  
371 statistical consideration and data normalization (Weiss et al. 2017; Anderson et al. 2011).

372 Plant host contamination of the microbiome sequence data is another consideration  
373 expected with analysis of the seed, and this challenge also applies to other plant compartments  
374 (Fitzpatrick et al. 2018; Song and Xie 2020). For 16S rRNA amplicon sequencing, the  
375 contaminant reads typically derive from host mitochondria and chloroplasts, but ITS or 18S  
376 amplicon analysis may also have reads annotated as Plantae. Therefore, nucleic acid extractions  
377 may attempt minimal disturbance of the plant tissue that is that target of microbiome  
378 investigation; for example, grinding tissues to include in the extraction will result in higher plant  
379 DNA contamination than separating microbial biomass from intact tissue. For seeds in  
380 particular, it is known that seeds can exude both antimicrobials and attractants to select for  
381 particular microbial members early in microbiome assembly of the germinated seed and  
382 emerging seedling (Chesneau et al. 2020; Meldau et al. 2012), and there is an active zone of  
383 plant and microbiome activity at the seed-soil-interface of a germinating seed (the  
384 spermosphere, e.g., Schiltz et al. 2015). Therefore, to target the native endophytic seed  
385 microbiome without also allowing for the plant's potential selection for or filtering against  
386 particular members, it is important to use dormant seeds and also to minimally disrupt the seed  
387 compartment during extraction. Notably, many protocols have opted to first germinate seeds  
388 and, therefore, study the outcome of any plant selection prior to analyzing the seed  
389 microbiome (Wassermann et al. 2021; Bergna et al. 2018; López-López et al. 2010).

390 Taking all of these methodological aspects into consideration, this study presents a  
391 protocol and analysis pipeline for endophyte microbiome DNA extraction from a single dormant  
392 seed that experiences minimal tissue disruption in the extraction process, includes both  
393 positive and negative sequencing controls, and includes bioinformatic steps to identify

394 contamination and remove host signal from the marker gene amplification. Notably, we chose  
395 to perform microbiome analysis based on a presence/absence taxon table rather than a table  
396 with relativized taxon abundances. This was done in consideration of the ecology of the seed  
397 endophyte microbiome members to likely be dormant until germination (Cope-Selby et al.  
398 2017), and therefore the differences in relativized abundances do not reflect differences in  
399 fitness outcomes inside the dormant seed. We acknowledge that relative abundances could  
400 reflect differential microbiome member recruitment by the host plant, but this is not the  
401 objective of the study and would be best addressed with a different design to determine the  
402 multi-generation consistency and transmission rates of any observed enrichments, which would  
403 be supported by assessment of the seed microbiome within individual seeds, and across plant  
404 generations.

405 In conclusion, individual seed microbiome assessment provides improved precision in  
406 our understanding of plant microbiome assembly and sets the stage for studies of vertical  
407 transmission. We found that seeds produced by an individual bean plant can be considered as  
408 a unit (for comparative treatment study designs), and that seeds produced by different plants  
409 are expected to have slightly different microbiomes, even if grown under the same, controlled  
410 conditions and in the same soil source. Future work may consider whether functional  
411 redundancy in plant beneficial phenotypes across seed microbiome members may provide one  
412 mechanism for consistent outcomes in beneficial plant microbiome establishment.

413

414 **Acknowledgments**

415            This research was supported by USDA 2019-67019-29305. AS acknowledges support  
416   from the USDA National Institute of Food and Agriculture and Michigan State University  
417   AgBioResearch (Hatch). AFB acknowledges a doctoral fellowship from the Fulbright Foundation  
418   and from Michigan State University. NS acknowledges support from the Michigan State  
419   University Plant Resilience Institute.  
420

421 **References**

- 422 Abdelfattah, A., Wisniewski, M., Schena, L., and Tack, A. J. M. 2021. Experimental evidence of  
423 microbial inheritance in plants and transmission routes from seed to phyllosphere and  
424 root. *Environ. Microbiol.*
- 425 Adam, E., Bernhart, M., Müller, H., Winkler, J., and Berg, G. 2018. The Cucurbita pepo seed  
426 microbiome: genotype-specific composition and implications for breeding. *Plant Soil.*  
427 422:35–49.
- 428 Anderson, M. J., Crist, T. O., Chase, J. M., Vellend, M., Inouye, B. D., Freestone, A. L., et al. 2011.  
429 Navigating the multiple meanings of  $\beta$  diversity: A roadmap for the practicing ecologist.  
430 *Ecol. Lett.* 14:19–28.
- 431 Barret, M., Briand, M., Bonneau, S., Prévieux, A., Valière, S., Bouchez, O., et al. 2015.  
432 Emergence shapes the structure of the seed microbiota. *Appl. Environ. Microbiol.*  
433 81:1257–1266.
- 434 Barret, M., Guimbaud, J. F., Darrasse, A., and Jacques, M. A. 2016. Plant microbiota affects seed  
435 transmission of phytopathogenic microorganisms. *Mol. Plant Pathol.* 17:791–795.
- 436 Op De Beeck, M., Lievens, B., Busschaert, P., Declerck, S., Vangronsveld, J., and Colpaert, J. V.  
437 2014. Comparison and validation of some ITS primer pairs useful for fungal  
438 metabarcoding studies. *PLoS One.* 9:e97629.
- 439 Bender, J. M., Li, F., Adisetiyo, H., Lee, D., Zabih, S., Hung, L., et al. 2018. Quantification of  
440 variation and the impact of biomass in targeted 16S rRNA gene sequencing studies.  
441 *Microbiome.* 6:155.
- 442 Berg, G., and Raaijmakers, J. M. 2018. Saving seed microbiomes. *ISME J.* 12:1167–1170.

- 443 Bergna, A., Cernava, T., Rändler, M., Grosch, R., Zachow, C., and Berg, G. 2018. Tomato seeds  
444 preferably transmit plant beneficial endophytes. *Phytobiomes J.* 2:183–193.
- 445 Bintarti, A. F., Kearns, P. J., Sulesky, A., and Shade, A. 2020. Abiotic treatment to common bean  
446 plants results in an altered seed microbiome. *bioRxiv*. Available at:  
447 <https://doi.org/10.1101/2020.06.05.134445>.
- 448 Caporaso, J. G., Bittinger, K., Bushman, F. D., Desantis, T. Z., Andersen, G. L., and Knight, R.  
449 2010. PyNAST: A flexible tool for aligning sequences to a template alignment.  
450 *Bioinformatics.* 26:266–267.
- 451 Caporaso, J. G., Kuczynski, J., Stombaugh, J., Bittinger, K., Bushman, F. D., Costello, E. K., et al.  
452 2010. QIIME allows analysis of high-throughput community sequencing data. *Nat.*  
453 *Methods.* 7:335–336.
- 454 Caporaso, J. G., Lauber, C. L., Walters, W. A., Berg-Lyons, D., Lozupone, C. A., Turnbaugh, P. J., et  
455 al. 2011. Global patterns of 16S rRNA diversity at a depth of millions of sequences per  
456 sample. *Proc. Natl. Acad. Sci. U. S. A.* 108:4516–4522.
- 457 Chartrel, V., Dugat-Bony, E., Sarthou, A. S., Huchette, S., Bonnarme, P., and Irlinger, F. 2021. The  
458 microbial community associated with pea seeds (*Pisum sativum*) of different  
459 geographical origins. *Plant Soil*.
- 460 Chesneau, G., Torres-Cortes, G., Briand, M., Darrasse, A., Preveaux, A., Marais, C., et al. 2020.  
461 Temporal dynamics of bacterial communities during seed development and maturation.  
462 *FEMS Microbiol. Ecol.* 96.
- 463 Cole, J. R., Wang, Q., Fish, J. A., Chai, B., McGarrell, D. M., Sun, Y., et al. 2014. Ribosomal  
464 Database Project: Data and tools for high throughput rRNA analysis. *Nucleic Acids Res.*

- 465           42.
- 466   Cope-Selby, N., Cookson, A., Squance, M., Donnison, I., Flavell, R., and Farrar, K. 2017.
- 467           Endophytic bacteria in *Miscanthus* seed: implications for germination, vertical
- 468           inheritance of endophytes, plant evolution and breeding. *GCB Bioenergy*. 9:57–77.
- 469   Dai, Y., Li, X. Y., Wang, Y., Li, C. X., He, Y., Lin, H. H., et al. 2020. The differences and overlaps in
- 470           the seed-resident microbiome of four Leguminous and three Gramineous forages.
- 471           *Microb. Biotechnol.* 13:1461–1476.
- 472   Davis, N. M., Proctor, Di. M., Holmes, S. P., Relman, D. A., and Callahan, B. J. 2018. Simple
- 473           statistical identification and removal of contaminant sequences in marker-gene and
- 474           metagenomics data. *Microbiome*. 6.
- 475   Edgar, R. C. 2010. Search and clustering orders of magnitude faster than BLAST. *Bioinformatics*.
- 476           26:2460–2461.
- 477   Edgar, R. C. 2013. UPARSE: Highly accurate OTU sequences from microbial amplicon reads. *Nat.*
- 478           *Methods*. 10:996–998.
- 479   Edgar, R. C., and Flyvbjerg, H. 2015. Error filtering, pair assembly and error correction for next-
- 480           generation sequencing reads. *Bioinformatics*. 31:3476–3482.
- 481   Eisenhofer, R., Minich, J. J., Marotz, C., Cooper, A., Knight, R., and Weyrich, L. S. 2019.
- 482           Contamination in Low Microbial Biomass Microbiome Studies: Issues and
- 483           Recommendations. *Trends Microbiol.* 27:105–117.
- 484   Eyre, A. W., Wang, M., Oh, Y., and Dean, R. A. 2019. Identification and characterization of the
- 485           core rice seed microbiome. *Phytobiomes J.* 3:148–157.
- 486   Fitzpatrick, C. R., Lu-Irving, P., Copeland, J., Guttman, D. S., Wang, P. W., Baltrus, D. A., et al.

- 487           2018. Chloroplast sequence variation and the efficacy of peptide nucleic acids for  
488           blocking host amplification in plant microbiome studies. *Microbiome*. 6.
- 489   Gdanetz, K., Benucci, G. M. N., Vande Pol, N., and Bonito, G. 2017. CONSTAX: A tool for  
490           improved taxonomic resolution of environmental fungal ITS sequences. *BMC*  
491           *Bioinformatics*. 18.
- 492   Hoagland, D. R., and Arnon, D. I. 1950. The water-culture method for growing plants without  
493           soil. *Circ. Calif. Agric. Exp. Stn.* 347:32.
- 494   Johnston-Monje, D., and Raizada, M. N. 2011. Conservation and Diversity of Seed Associated  
495           Endophytes in Zea across Boundaries of Evolution, Ethnography and Ecology. *PLoS One*.  
496           6:e20396.
- 497   Kindt, R. 2020. BiodiversityR: Package for Community Ecology and Suitability Analysis. R  
498           package version 2.13-1. [https://cran.r-](https://cran.r-project.org/web/packages/BiodiversityR/index.html)  
499           [project.org/web/packages/BiodiversityR/index.html](https://cran.r-project.org/web/packages/BiodiversityR/index.html).
- 500   Klaedtke, S., Jacques, M. A., Raggi, L., Prévieux, A., Bonneau, S., Negri, V., et al. 2016. Terroir is  
501           a key driver of seed-associated microbial assemblages. *Environ. Microbiol.* 18:1792–  
502           1804.
- 503   Latz, M. A. C., Kerrn, M. H., Sørensen, H., Collinge, D. B., Jensen, B., Brown, J. K. M., et al. 2021.  
504           Succession of the fungal endophytic microbiome of wheat is dependent on tissue-  
505           specific interactions between host genotype and environment. *Sci. Total Environ.*  
506           759:143804.
- 507   López-López, A., Rogel, M. A., Ormeño-Orrillo, E., Martínez-Romero, J., and Martínez-Romero,  
508           E. 2010. Phaseolus vulgaris seed-borne endophytic community with novel bacterial



- 509 species such as *Rhizobium endophyticum* sp. nov. *Syst. Appl. Microbiol.* 33:322–327.
- 510 Martin, M. 2011. Cutadapt Removes Adapter Sequences from High-Throughput Sequencing  
511 Reads. *EMBnet.journal.* 17:10–12.
- 512 McKnight, D. T., Huerlimann, R., Bower, D. S., Schwarzkopf, L., Alford, R. A., and Zenger, K. R.  
513 2019. microDecon: A highly accurate read-subtraction tool for the post-sequencing  
514 removal of contamination in metabarcoding studies. *Environ. DNA.* 1:14–25.
- 515 McMurdie, P. J., and Holmes, S. 2013. Phyloseq: An R Package for Reproducible Interactive  
516 Analysis and Graphics of Microbiome Census Data. *PLoS One.* 8.
- 517 Meldau, D. G., Long, H. H., and Baldwin, L. T. 2012. A native plant growth promoting bacterium,  
518 *Bacillus* sp. B55, rescues growth performance of an ethylene-insensitive plant genotype  
519 in nature. *Front. Plant Sci.* 3.
- 520 Mitter, B., Pfaffenbichler, N., Flavell, R., Compant, S., Antonielli, L., Petric, A., et al. 2017. A new  
521 approach to modify plant microbiomes and traits by introducing beneficial bacteria at  
522 flowering into progeny seeds. *Front. Microbiol.* 8:1–10.
- 523 Nelson, E. B. 2018. The seed microbiome: Origins, interactions, and impacts. *Plant Soil.* 422:7–  
524 34.
- 525 Oksanen, J., Blanchet, F. G., Friendly, M., Kindt, R., Legendre, P., McGlinn, D., et al. 2019. vegan:  
526 Community Ecology Package. R package version 2.5-7. [https://CRAN.R-](https://CRAN.R-project.org/package=vegan)  
527 [project.org/package=vegan](https://CRAN.R-project.org/package=vegan).
- 528 Paulson, J. N., Colin Stine, O., Bravo, H. C., and Pop, M. 2013. Differential abundance analysis for  
529 microbial marker-gene surveys. *Nat. Methods.* 10:1200–1202.
- 530 Pinheiro, J., Bates, D., DebRoy, S., and Sarkar, D. 2021. nlme: Linear and Nonlinear Mixed Effects

- 531 Models. R package version 3.1-152. <https://CRAN.R-project.org/package=nlme>.
- 532 Quast, C., Pruesse, E., Yilmaz, P., Gerken, J., Schweer, T., Yarza, P., et al. 2013. The SILVA  
533 ribosomal RNA gene database project: Improved data processing and web-based tools.  
534 Nucleic Acids Res. 41:D590–D596.
- 535 Raj, G., Shadab, M., Deka, S., Das, M., Baruah, J., Bharali, R., et al. 2019. Seed interior  
536 microbiome of rice genotypes indigenous to three agroecosystems of Indo-Burma  
537 biodiversity hotspot. BMC Genomics. 20:924.
- 538 Rezki, S., Campion, C., Iacomi-Vasilescu, B., Preveaux, A., Toualbia, Y., Bonneau, S., et al. 2016.  
539 Differences in stability of seed-associated microbial assemblages in response to invasion  
540 by phytopathogenic microorganisms. PeerJ. 4:e1923.
- 541 Rezki, S., Campion, C., Simoneau, P., Jacques, M.-A., Shade, A., and Barret, M. 2018. Assembly  
542 of seed-associated microbial communities within and across successive plant  
543 generations. Plant Soil. 422:67–79.
- 544 Rideout, J. R., He, Y., Navas-Molina, J. A., Walters, W. A., Ursell, L. K., Gibbons, S. M., et al. 2014.  
545 Subsampled open-reference clustering creates consistent, comprehensive OTU  
546 definitions and scales to billions of sequences. PeerJ. 2:e545.
- 547 Rodríguez, C. E., Antonielli, L., Mitter, B., Trognitz, F., and Sessitsch, A. 2020. Heritability and  
548 functional importance of the setaria viridis bacterial seed microbiome. Phytobiomes J.  
549 4:40–52.
- 550 Schiltz, S., Gaillard, I., Pawlicki-Jullian, N., Thiombiano, B., Mesnard, F., and Gontier, E. 2015. A  
551 review: What is the spermosphere and how can it be studied? J. Appl. Microbiol.  
552 119:1467–1481.

- 553 Shade, A., Jacques, M.-A. M. A. M.-A., and Barret, M. 2017. *Ecological patterns of seed*  
554 *microbiome diversity, transmission, and assembly*.
- 555 Song, L., and Xie, K. 2020. Engineering CRISPR/Cas9 to mitigate abundant host contamination  
556 for 16S rRNA gene-based amplicon sequencing. *Microbiome*. 8.
- 557 Truyens, S., Weyens, N., Cuypers, A., and Vangronsveld, J. 2015. Bacterial seed endophytes:  
558 Genera, vertical transmission and interaction with plants. *Environ. Microbiol. Rep.* 7:40–  
559 50.
- 560 Vujanovic, V., and Germida, J. J. 2017. Seed endosymbiosis: A vital relationship in providing  
561 prenatal care to plants. *Can. J. Plant Sci.* 97:971–981.
- 562 Wang, Q., Garrity, G. M., Tiedje, J. M., and Cole, J. R. 2007. Naïve Bayesian classifier for rapid  
563 assignment of rRNA sequences into the new bacterial taxonomy. *Appl. Environ.*  
564 *Microbiol.* 73:5261–5267.
- 565 Wassermann, B., Cernava, T., Müller, H., Berg, C., and Berg, G. 2019. Seeds of native alpine  
566 plants host unique microbial communities embedded in cross-kingdom networks.  
567 *Microbiome*. 7:108.
- 568 Wassermann, B., Rybakova, D., Adam, E., Zachow, C., Bernhard, M., Müller, M., et al. 2021.  
569 Studying seed microbiomes. In *The Plant Microbiome: Methods and Protocols, Methods*  
570 *in Molecular Biology*, eds. L C Carvalhais and P G Dennis. , p. 1–21.
- 571 Weiss, S., Xu, Z. Z., Peddada, S., Amir, A., Bittinger, K., Gonzalez, A., et al. 2017. Normalization  
572 and microbial differential abundance strategies depend upon data characteristics.  
573 *Microbiome*. 5.
- 574 Xing, H. Q., Ma, J. C., Xu, B. L., Zhang, S. W., Wang, J., Cao, L., et al. 2018. Mycobiota of maize

575 seeds revealed by rDNA-ITS sequence analysis of samples with varying storage times.

576 Microbiologyopen. 7.

577

578

579 **Figure Legends**

580 **Figure 1.** Rarefaction curves of bacteria/archaea (a) and fungi (b) from seed samples (marked)  
581 at 97 % of clustering threshold were constructed by plotting the OTU number after  
582 decontamination (microbial contaminants removal) to the sequence (read) number. The  
583 rarefaction curves were constructed using vegan package (v2.5-4). Rank abundance curve of  
584 decontaminated and normalized bacterial/archaeal (c) and fungal (d) OTU tables. Samples  
585 (n=47 and n=45 for bacteria/archaea and fungi, respectively) were grouped by plant.

586  
587 **Figure 2.** Bacterial/archaeal richness among plants were different (linear mixed-effects model,  
588 LMM; df = 2, F-value = 6.91, p-value = 0.015) (a), but not among pods within plant (p-value >  
589 0.05) (b). Specifically, plant B and C displayed lower bacterial/archaeal richness compared to  
590 the plant A (Tukey's HSD post hoc test; p-value = 0.001 and 0.006, respectively).

591 Bacterial/archaeal phylogenetic diversity among plants were different (linear mixed-effects  
592 model, LMM; df = 2, F-value = 6.56, p-value = 0.003) (c), but not among pods within plant (p-  
593 value > 0.05) (d). Specifically, plant B and C displayed lower bacterial/archaeal phylogenetic  
594 diversity compared to the plant A (Tukey's HSD post hoc test, p-value = 0.001 and 0.013,  
595 respectively). Fungal richness was not different among plants (linear mixed-effects model,  
596 LMM; df = 2, F-value = 1.11, p-value = 0.37) (e) and among pods within plant (p-value = 0.55) (f).

597  
598 **Figure 3.** Principal coordinate analysis (PCoA) plot based on Jaccard dissimilarities of  
599 bacterial/archaeal (a) and fungal (b) OTUs. The samples were plotted and grouped based on  
600 plant as illustrated different colors. Each point was labelled by pod. Statistical analysis showed

601 that seed bacterial/archaeal community structure differ among plants (nested PERMANOVA, df  
602 =2, F-ratio = 2.94, p-value = 0.002) but not pods (nested PERMANOVA, df =9, F-ratio = 0.99, p-  
603 value = 0.63). Statistical analysis also showed that seed fungal community structure differs  
604 among plants (nested PERMANOVA, df =2, F-ratio = 1.55, p-value = 0.023) and pods (nested  
605 PERMANOVA, df =9, F-ratio = 1.27, p-value = 0.03). Distance to centroid analysis using  
606 betadisper function from the vegan package revealed that there is variation in  
607 bacterial/archaeal Beta diversity among plant (PERMADISP, df = 2, F-value = 63.9, p-value =  
608 9.6e-14) (c). In contrast, there were no variation in fungal Beta diversity among plant  
609 (PERMADISP, df = 2, F-value = 0.22, p-value = 0.802) (d).

610  
611 **Figure 4.** Bar plot represents mean relative abundances of bacterial/archaeal (a) and fungal (b)  
612 classes detected across plants. For bacteria/archaea, each pod consisted of 4 seeds (except for  
613 C5; 3 seeds); and for fungi, each pod consisted of 4 seeds (except for A1, B1 and C5; 3 seeds).  
614 The endophyte microbiome was assessed from the DNA extracted from single seed collected  
615 from each pod. Bacterial/archaeal and fungal classes with mean relative abundances of less  
616 than 10 % were grouped into the 'Other' classification, which includes many lineages (not  
617 monophyletic).

618  
619 **Figure 5.** Analysis of power using `pwr.t.test()` function from the `pwr` package revealed that an  
620 effect of treatment on the 16S rRNA bacterial/archaeal alpha diversity (richness (a) and  
621 phylogenetic diversity (b)) would be detectable 12 plants at a power of 0.8. Because the  
622 highest seed microbiome variability was at the maternal plant level, individual seed microbiome

623 sequence profiles were pooled in silico by plant to perform this power analysis at the individual  
624 plant level.

625

626 **Figure S1.** The proportion of plant reads of the total bacterial/archaeal (a) and fungal (b) reads  
627 showed that more than 90 % reads obtained were plant contaminants.

628

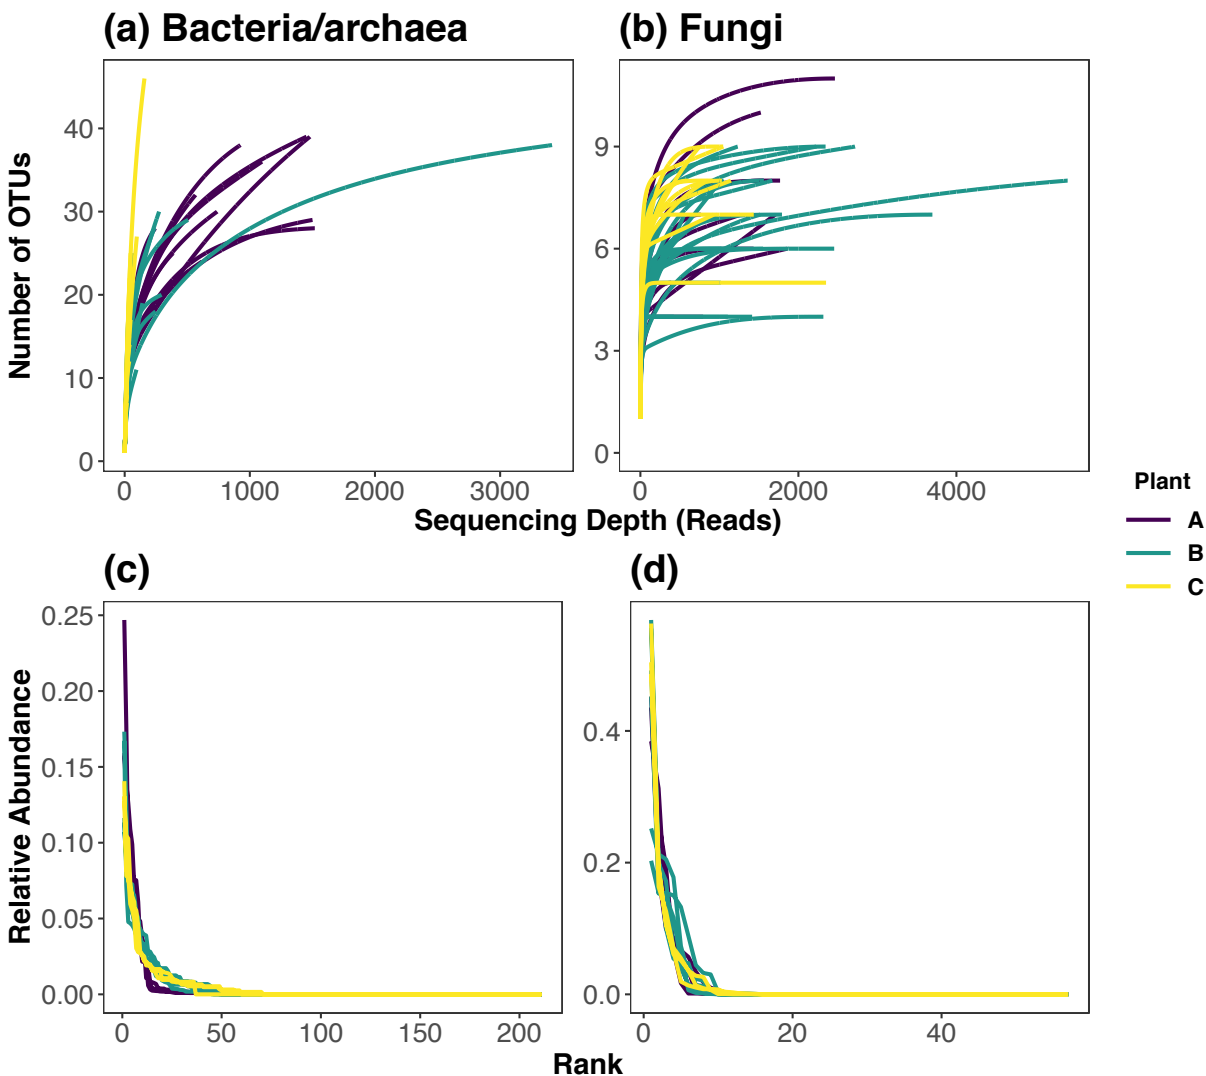

**Fig 1.** Rarefaction curves of bacteria/archaea (a) and fungi (b) from seed samples (marked) at 97 % of clustering threshold were constructed by plotting the OTU number after decontamination (microbial contaminants removal) to the sequence (read) number. The rarefaction curves were constructed using vegan package (v2.5-4). Rank abundance curve of decontaminated and normalized bacterial/archaeal (c) and fungal (d) OTU tables. Samples (n=47 and n=45 for bacteria/archaea and fungi, respectively) were grouped by plant.



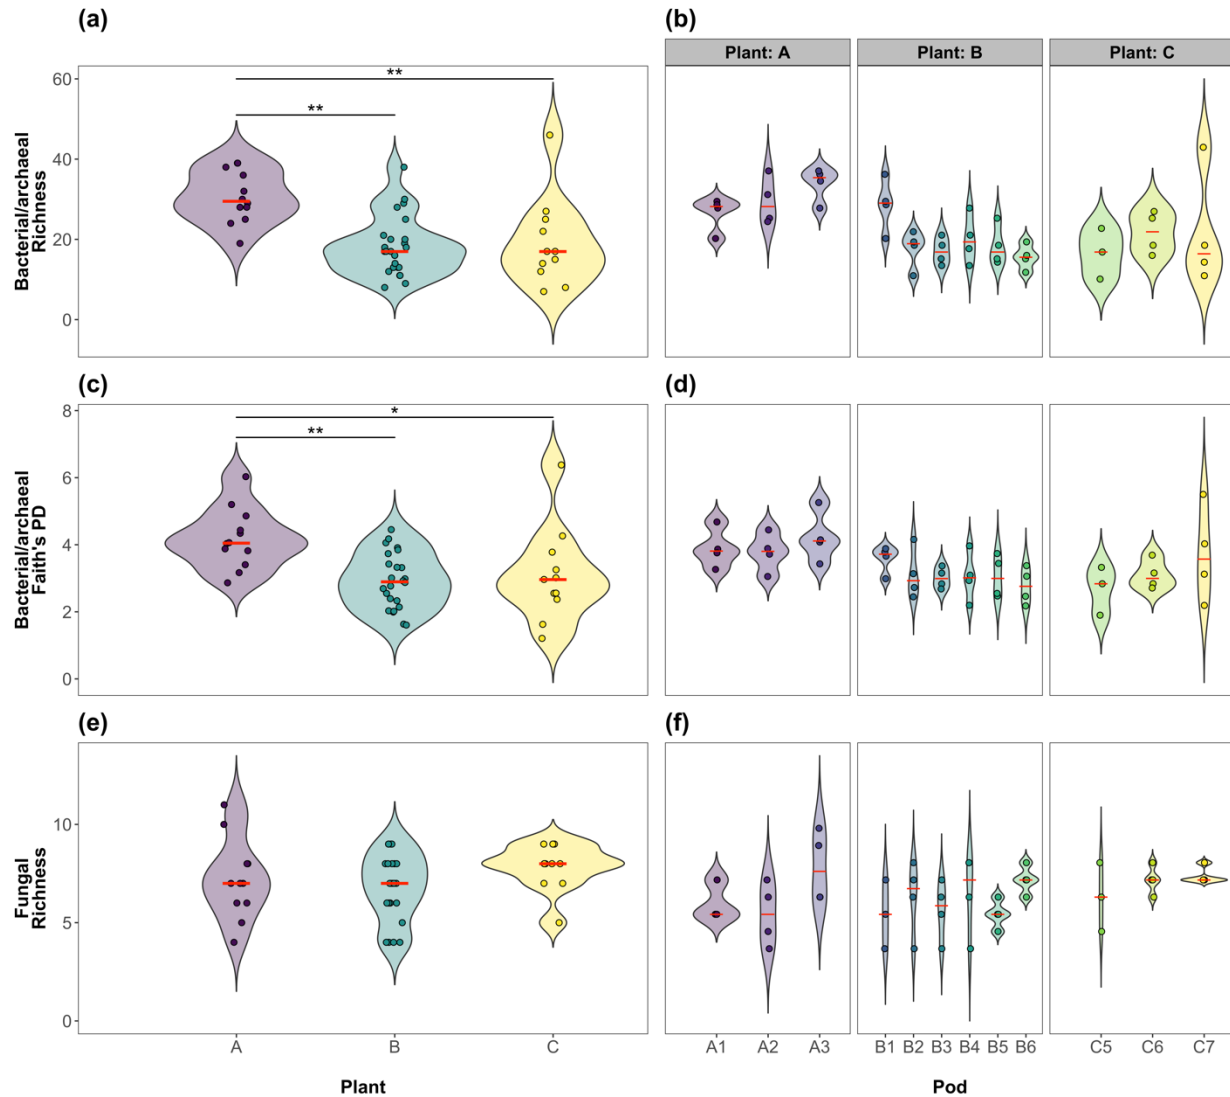

**Fig 2.** Bacterial/archaeal richness among plants were different (linear mixed-effects model, LMM;  $df = 2$ ,  $F$ -value = 6.91,  $p$ -value = 0.015) (a), but not among pods within plant ( $p$ -value > 0.05) (b). Specifically, plant B and C displayed lower bacterial/archaeal richness compared to the plant A (Tukey's HSD post hoc test;  $p$ -value = 0.001 and 0.006, respectively). Bacterial/archaeal phylogenetic diversity among plants were different (linear mixed-effects model, LMM;  $df = 2$ ,  $F$ -value = 6.56,  $p$ -value = 0.003) (c), but not among pods within plant ( $p$ -value > 0.05) (d). Specifically, plant B and C displayed lower bacterial/archaeal phylogenetic diversity compared to the plant A (Tukey's HSD post hoc test,  $p$ -value = 0.001 and 0.013, respectively). Fungal richness was not different among plants (linear mixed-effects model, LMM;  $df = 2$ ,  $F$ -value = 1.11,  $p$ -value = 0.37) (e) and among pods within plant ( $p$ -value = 0.55) (f).

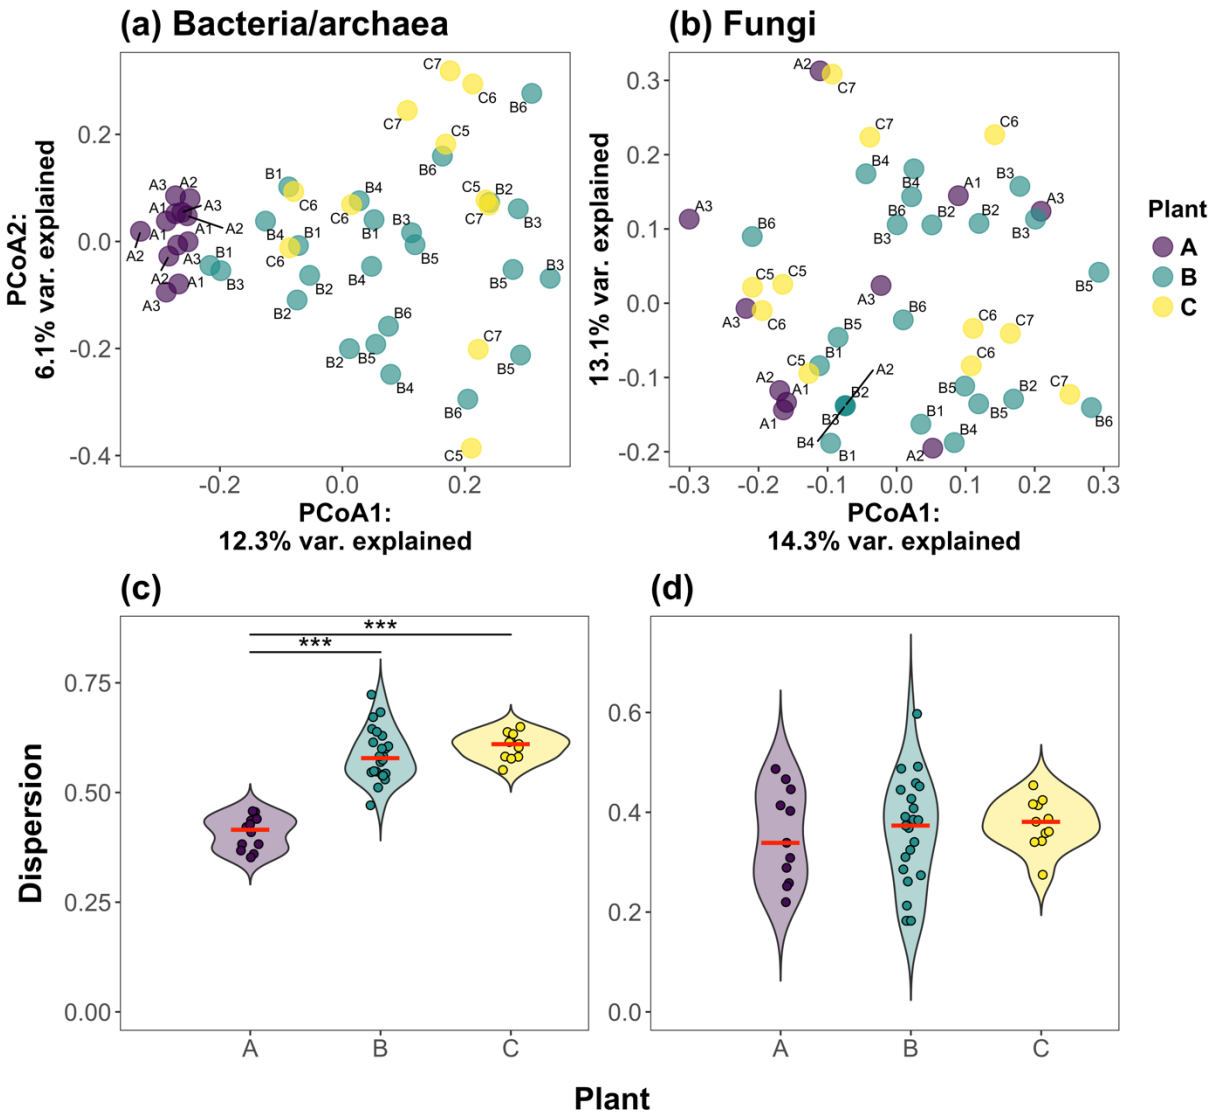

**Fig 3.** Principal coordinate analysis (PCoA) plot based on Jaccard dissimilarities of bacterial/archaeal (a) and fungal (b) OTUs. The samples were plotted and grouped based on plant as illustrated different colors. Each point was labelled by pod. Statistical analysis showed that seed bacterial/archaeal community structure differ among plants (nested PERMANOVA,  $df = 2$ , F-ratio = 2.94, p-value = 0.002) but not pods (nested PERMANOVA,  $df = 9$ , F-ratio = 0.99, p-value = 0.63). Statistical analysis also showed that seed fungal community structure differs among plants (nested PERMANOVA,  $df = 2$ , F-ratio = 1.55, p-value = 0.023) and pods (nested PERMANOVA,  $df = 9$ , F-ratio = 1.27, p-value = 0.03). Distance to centroid analysis using betadisper function from the vegan package revealed that there is variation in bacterial/archaeal Beta diversity among plant (PERMDISP,  $df = 2$ , F-value = 63.9, p-value =  $9.6e-14$ ) (c). In contrast, there were no variation in fungal Beta diversity among plant (PERMDISP,  $df = 2$ , F-value = 0.22, p-value = 0.802) (d).

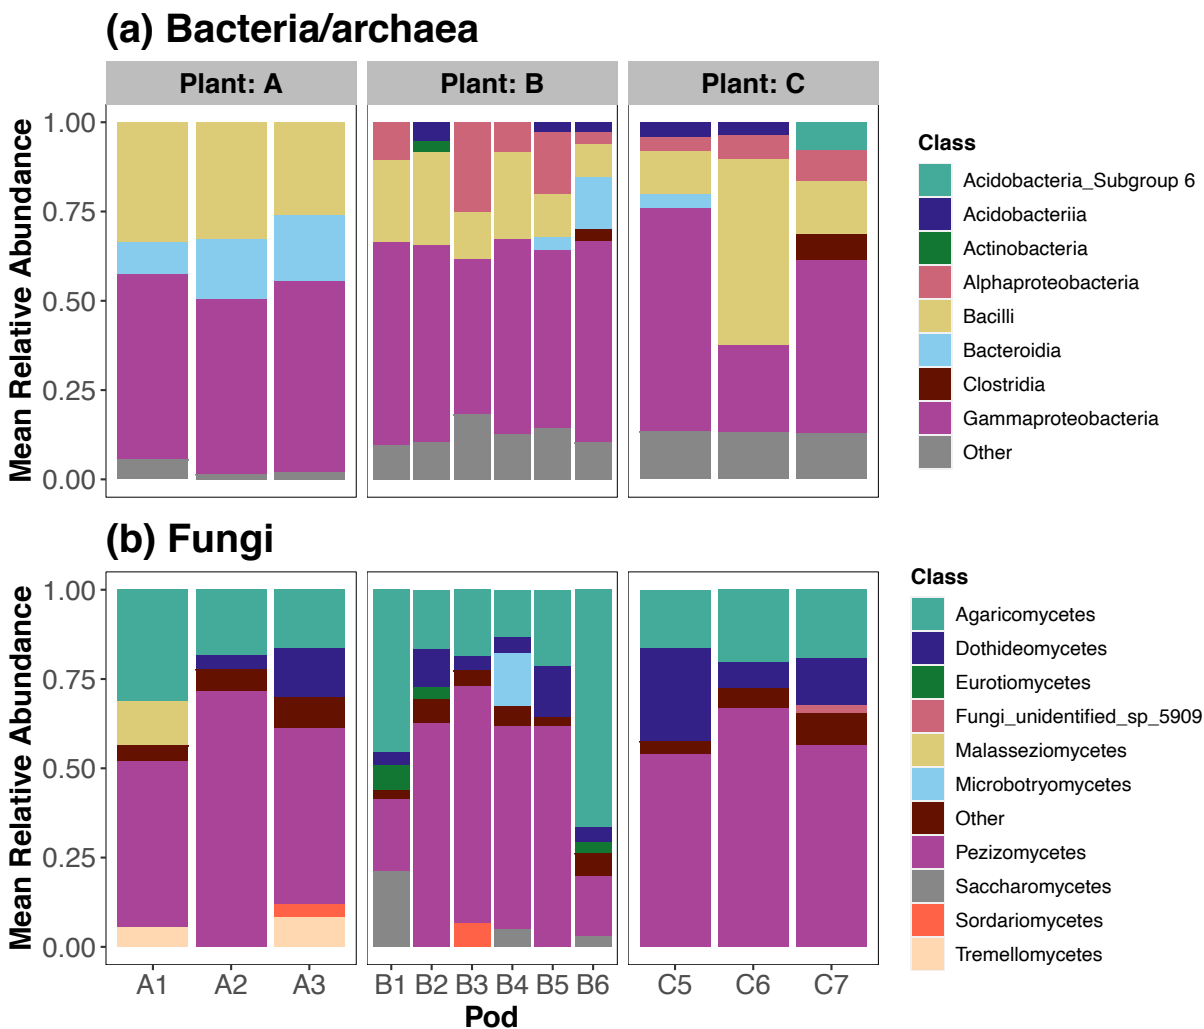

**Fig 4.** Bar plot represents mean relative abundances of bacterial/archaeal (a) and fungal (b) classes detected across plants. For bacteria/archaea, each pod consisted of 4 seeds (except for C5; 3 seeds); and for fungi, each pod consisted of 4 seeds (except for A1, B1 and C5; 3 seeds). The endophyte microbiome was assessed from the DNA extracted from single seed collected from each pod. Bacterial/archaeal and fungal classes with mean relative abundances of less than 10 % were grouped into the ‘Other’ classification, which includes many lineages (not monophyletic).

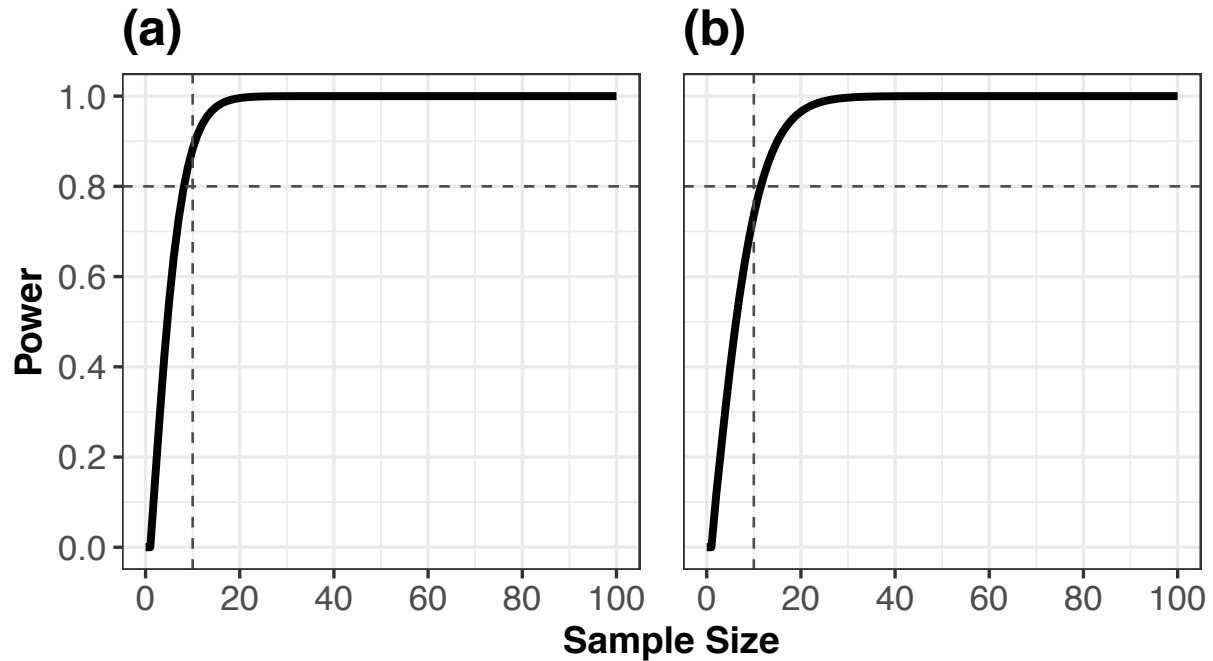

**Fig 5.** Analysis of power using *pwr.t.test* () function from the *pwr* package revealed that an effect of treatment on the 16S rRNA bacterial/archaeal alpha diversity (richness (a) and phylogenetic diversity (b)) would be detectable 12 plants at a power of 0.8. Because the highest seed microbiome variability was at the maternal plant level, individual seed microbiome sequence profiles were pooled *in silico* by plant to perform this power analysis at the individual plant level.
